# Supplementary material for: In situ synthesis and immobilization of a Cu(ii)–pyridyl complex on silica microspheres as a novel Fenton-like catalyst for RhB degradation at near-neutral pH
Source: Royal Society of Chemistry journal article supplement (doi:10.1039/c7ra02916k), 2017-01-01
Supplement: c7ra02916k1.pdf [file c7ra02916k1.pdf]

Supplementary materials

***RSC Advances***

***In situ* synthesis and immobilization of Cu(II)-pyridyl complex on silica  
microsphere as a new Fenton-like catalyst for RhB degradation at near-  
neutral pH**

Wenhua Yuan<sup>1</sup>, Chaoying Zhang<sup>1</sup>, Hong Wei<sup>2</sup>, Qinqin Wang<sup>1</sup>, Kebin Li<sup>1\*</sup>

<sup>1</sup>College of Chemistry & Material Science, Key Laboratory of Synthetic and Natural  
Function Molecule Chemistry, Ministry of Education, Northwest University, Xi'an 710069,  
PR China;

<sup>2</sup> State Key Laboratory Base of Eco-Hydraulic Engineering in Arid Areas, Xi'an University  
of Technology, Xi'an 710048, PR China

---

\*Corresponding author. Phone: +001-132-5988-2543, E-mail: [kebin68li@163.com](mailto:kebin68li@163.com)

E-mail: [kebin68li@163.com](mailto:kebin68li@163.com)

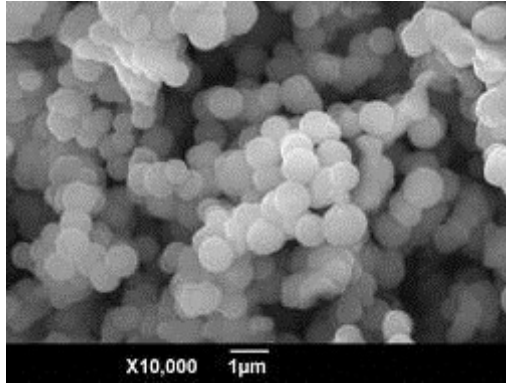

Fig. S1 SEM image of the prepared silica particles

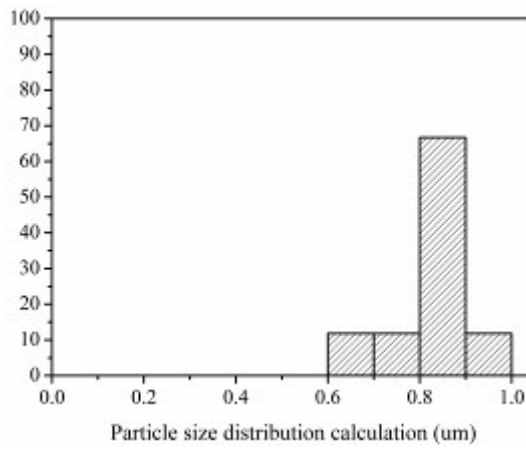

Fig. S2 Size distribution of the silica microspheres

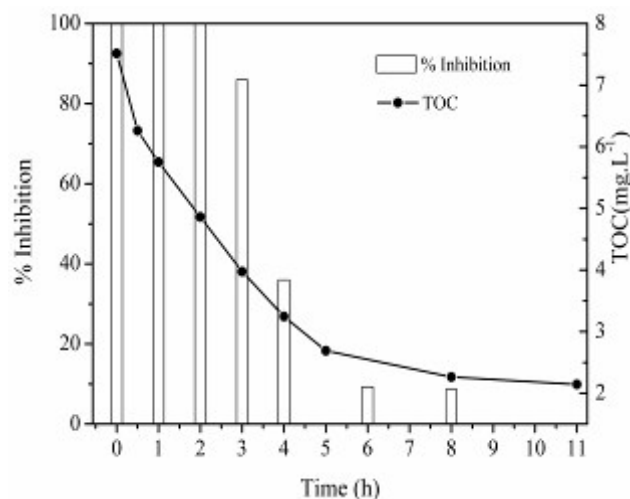

Fig. S3 Temporal changes of TOC and toxicity during the degradation of 10 mg·L<sup>-1</sup> RhB. ([catalyst]=2 g·L<sup>-1</sup>; [H<sub>2</sub>O<sub>2</sub>]=200 mg·L<sup>-1</sup>; pH =7.1; T=20 °C).

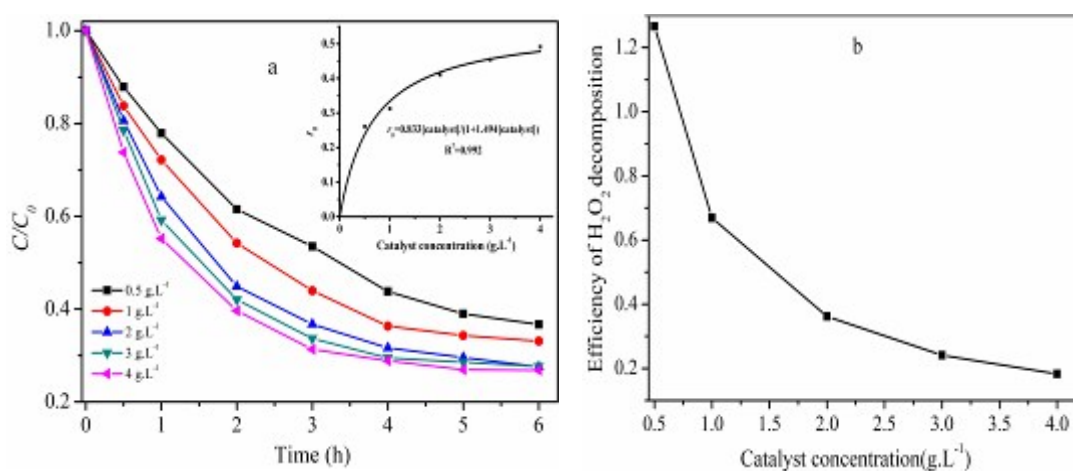

Fig. S4. Decomposition of H<sub>2</sub>O<sub>2</sub> catalyzed by the prepared catalyst. (a) Effects of catalyst dosage on H<sub>2</sub>O<sub>2</sub> decomposition. (b) Efficiency of H<sub>2</sub>O<sub>2</sub> decomposition versus catalyst dosage. Decomposition efficiency (DE) was assessed by the following equation:

$$DE = \frac{\Delta[H_2O_2]}{[H_2O_2][catalyst]} \times 100\%$$

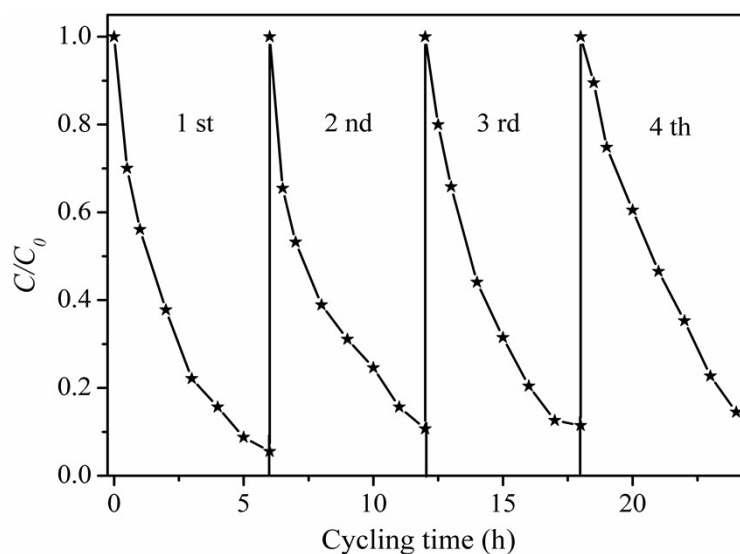

Fig. S5 Time profiles for the cyclic degradation of RhB. ( $[\text{RhB}] = 5 \text{ mg}\cdot\text{L}^{-1}$ ;  $[\text{catalyst}] = 2 \text{ g}\cdot\text{L}^{-1}$ ;  $[\text{H}_2\text{O}_2] = 200 \text{ mg}\cdot\text{L}^{-1}$ ;  $\text{pH} = 7.1$ ;  $T = 20 \text{ }^\circ\text{C}$ )

Table S1 The kinetic parameters for RhB degradation under various experimental conditions

| Concentration of catalyst ( $\text{g}\cdot\text{L}^{-1}$ )                | $k(\text{h}^{-1})$ | $R^2$ |                                                      |
|---------------------------------------------------------------------------|--------------------|-------|------------------------------------------------------|
| 0.5                                                                       | 0.360              | 0.998 |                                                      |
| 1                                                                         | 0.395              | 0.995 |                                                      |
| 2                                                                         | 0.484              | 0.998 |                                                      |
| 3                                                                         | 0.547              | 0.997 |                                                      |
| 4                                                                         | 0.556              | 0.992 |                                                      |
| Concentration of $\text{H}_2\text{O}_2$ ( $\text{mg}\cdot\text{L}^{-1}$ ) |                    |       |                                                      |
| 50                                                                        | 0.251              | 0.996 |                                                      |
| 100                                                                       | 0.369              | 0.997 |                                                      |
| 150                                                                       | 0.453              | 0.998 |                                                      |
| 200                                                                       | 0.484              | 0.998 |                                                      |
| 250                                                                       | 0.607              | 0.997 |                                                      |
| 300                                                                       | 0.665              | 0.996 |                                                      |
| Concentration of dye ( $\text{mg}\cdot\text{L}^{-1}$ )                    | $k(\text{h}^{-1})$ | $R^2$ | $r_0(\text{mg}\cdot\text{L}^{-1}\cdot\text{h}^{-1})$ |
| 2.5                                                                       | 0.574              | 0.992 | 0.252                                                |
| 5                                                                         | 0.484              | 0.998 | 0.314                                                |
| 10                                                                        | 0.392              | 0.997 | 0.454                                                |
| 12.5                                                                      | 0.306              | 0.995 | 0.476                                                |

Table S2 Rate constants and the activation parameters for the degradation of RhB with H<sub>2</sub>O<sub>2</sub> catalyzed by Cu(II)–pyridyl complex immobilized on silica microspheres

| T(K)   | Rate constant                  |                       | Activation parameters                            |                                                                 |                                                    |                                                    |
|--------|--------------------------------|-----------------------|--------------------------------------------------|-----------------------------------------------------------------|----------------------------------------------------|----------------------------------------------------|
|        | <i>k</i><br>(h <sup>-1</sup> ) | <i>R</i> <sup>2</sup> | <i>E</i> <sub>a</sub><br>(kJ·mol <sup>-1</sup> ) | Δ <i>S</i> <sup>#</sup> (J·mol <sup>-1</sup> ·K <sup>-1</sup> ) | Δ <i>H</i> <sup>#</sup><br>(kJ·mol <sup>-1</sup> ) | Δ <i>G</i> <sup>#</sup><br>(kJ·mol <sup>-1</sup> ) |
| 293.15 | 0.483                          | 0.996                 |                                                  |                                                                 |                                                    |                                                    |
| 297.65 | 0.587                          | 0.984                 | 38.60                                            | -119.55                                                         | 36.13                                              | 71.71                                              |
| 307.65 | 0.972                          | 0.993                 |                                                  |                                                                 |                                                    |                                                    |
| 317.65 | 1.597                          | 0.991                 |                                                  |                                                                 |                                                    |                                                    |
